# Supplementary material
Source: PubMed Central journal article supplement (PMC2811374)
Supplement: NIHMS169022-supplement-supplement_1.pdf [file NIHMS169022-supplement-supplement_1.pdf]

**Supplemental Table 1. Primers for *Has* and *Hyal* genes.**

Primer sequences, melting temperature ( $T_M$ ), cycle numbers and predicted product sizes for analysis of rat *Has* and *Hyal* gene expression by semi-quantitative RT-PCR. Similar information is also given for the expression of the housekeeping gene  $\beta$ -actin, which was measured for control purposes.

| Gene           | Sense Strand Primer   | Antisense Strand Primer | $T_M$<br>(°C) | No. of<br>Cycles | Product Size<br>(bp) |
|----------------|-----------------------|-------------------------|---------------|------------------|----------------------|
| Has1           | GAGGTGGAGGCTGAGGAC    | AGCTGACCCAAGAGTCCAGA    | 60            | 30               | 283                  |
| Has2           | CTGGAAGAACAACCTCCATGA | ATAAGACTGGCAGGCGGTTT    | 60            | 30               | 379                  |
| Has3           | CTTCTTTGTGTGGCGTAGCA  | GCACTTGCTGCCTACGAACT    | 60            | 30               | 496                  |
| Hyal1          | CCGTTTGGCTTTAGTTTCCA  | AGCTTCGCTGCACAAAAGAG    | 60            | 35               | 274                  |
| Hyal2          | ACAGCCGCAACTTTGTCAG   | GTACTGGCGCTGGGATTG      | 65            | 40               | 367                  |
| Hyal3          | TGGGGCTTTTATCGATACCC  | CAGCCTTGGTCACGTTGAT     | 65            | 30               | 469                  |
| $\beta$ -actin | TTCTACAATGAGCTGCGTGTG | ATCACAATGCCAGTGGTACG    | 60            | 20               | 191                  |
